# Supplementary figures and images for: Forms of benefit sharing in global health research undertaken in resource poor settings: a qualitative study of stakeholders' views in Kenya
Source: Springer Nature journal article supplement (doi:10.1186/1747-5341-7-7), 2012-01-01

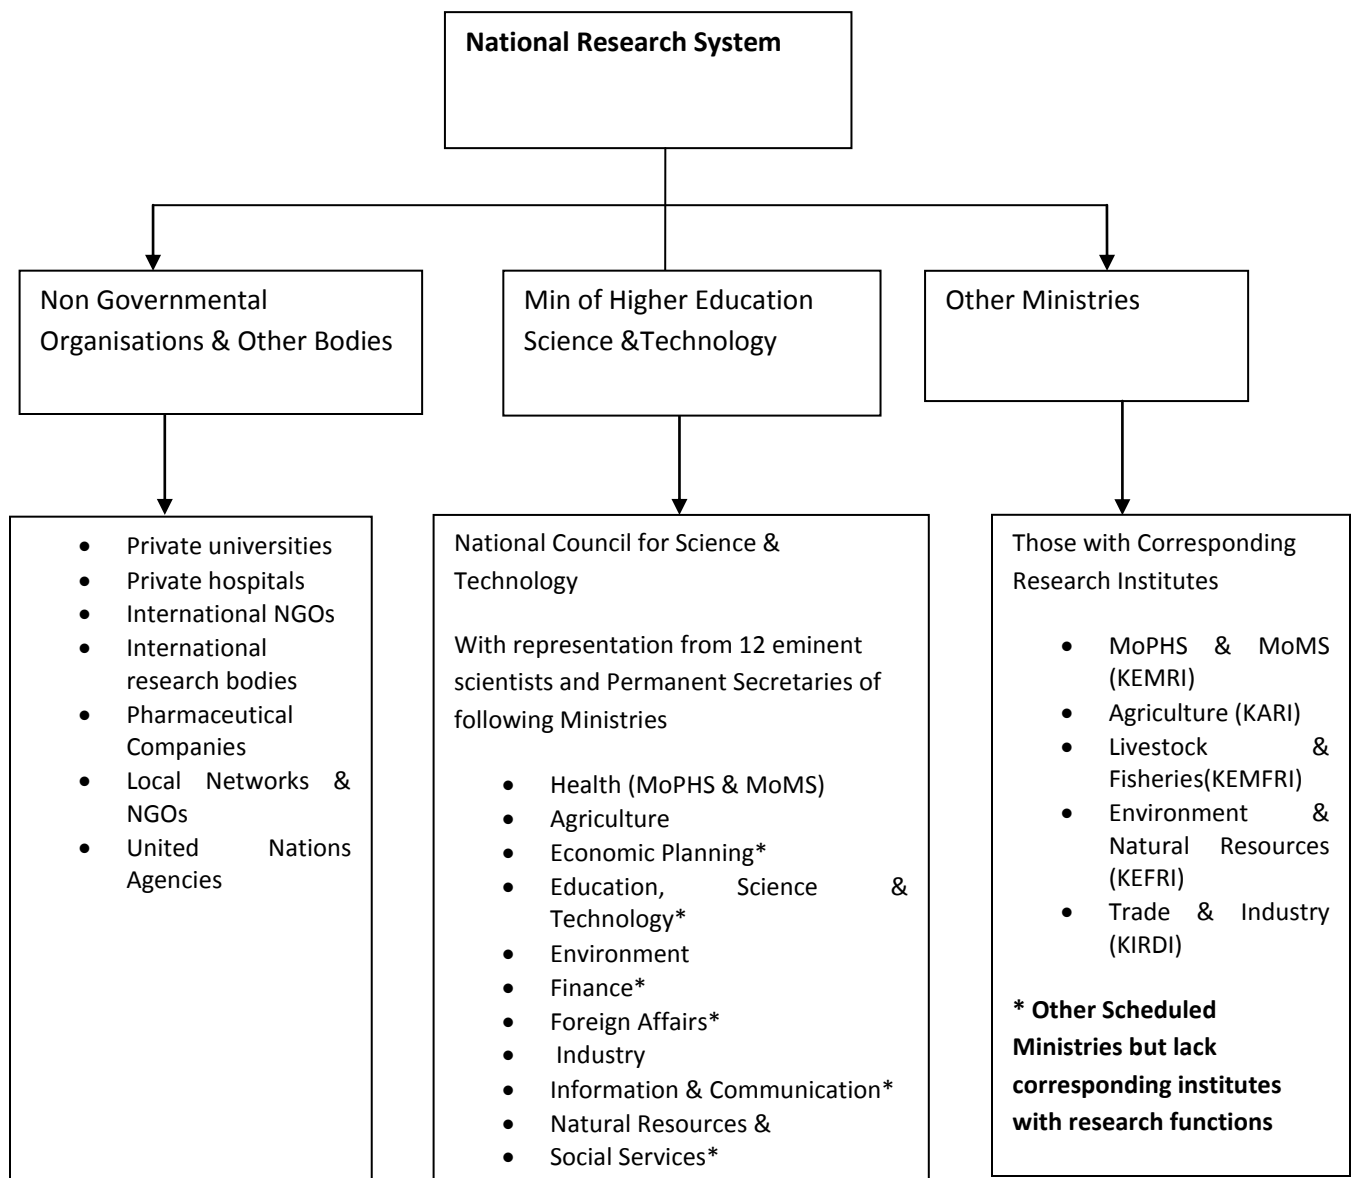

Supplement: Additional file 1 [file 1747-5341-7-7-s1.pdf]
